# Supplementary material for: Differential Transcriptome Responses in Human THP-1 Macrophages Following Exposure to T98G and LN-18 Human Glioblastoma Secretions: A Simplified Bioinformatics Approach to Understanding Patient-Glioma-Specific Effects on Tumor-Associated Macrophages
Source: MDPI journal article supplement (doi:10.3390/ijms24065115), 2023-03-07
Supplement: s1 [file s1]

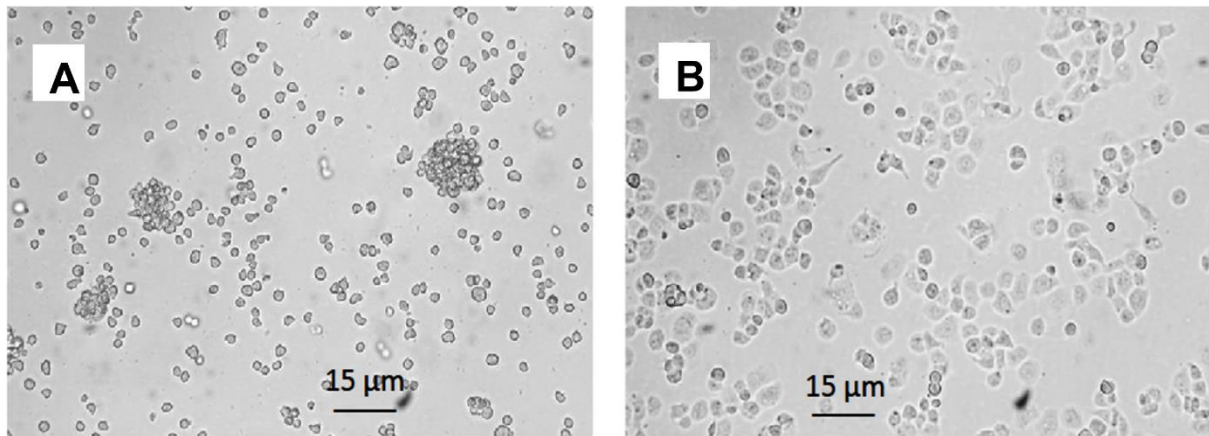

**Figure S1.** Differentiated THP-1 macrophages display different phenotypes compared to undifferentiated THP-1 monocytes. Representative images of THP-1 cells showing morphological differences of (A) undifferentiated THP-1 cells in culture and (B) THP-1 cells treated with 16 nM (10 ng/mL) PMA for 48 h and allowed to subsequently rest for 24 h. Scale bar = 15  $\mu$ m.

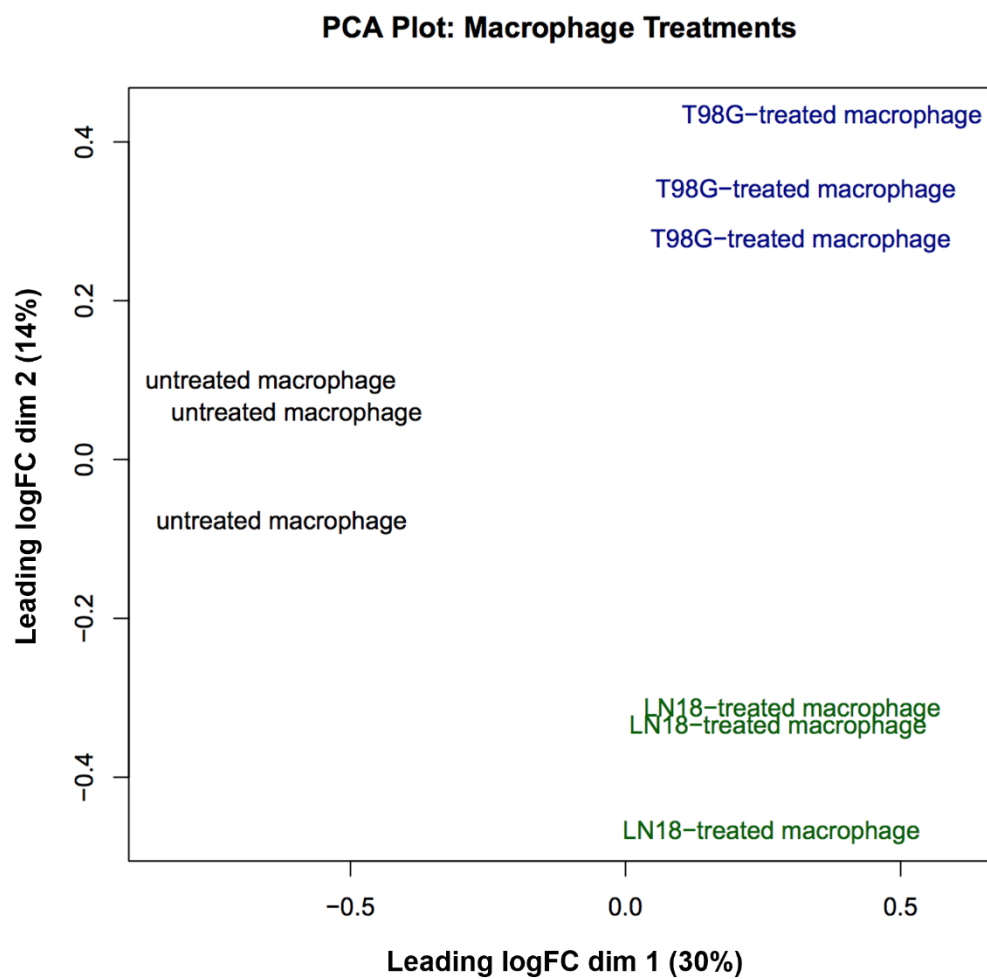

**Figure S2.** Principle Component Analysis (PCA) plot shows close clustering of all sample replicates, indicating low technical variation.

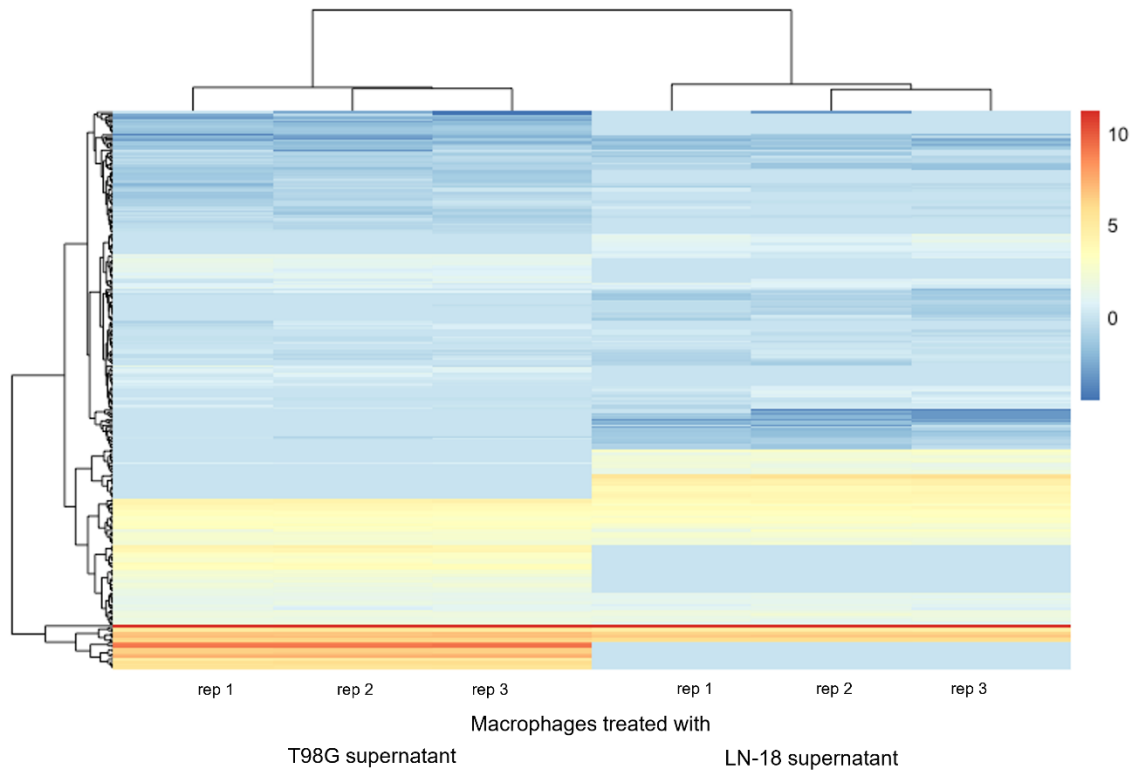

**Figure S3.** Heatmap of log Fold Change (logFC) of all genes (both in common and not in common) between THP-1 macrophages treated with either supernatant exposed to LN-18 or T98G glioma cells, showing a clear difference in the effect the glioma supernatants have on TPH-1 macrophages. Replicates (rep) refer to biological replicates.
